# Supplementary material for: Integrated analysis of single-cell and bulk transcriptome reveals hypoxia-induced immunosuppressive microenvironment to predict immunotherapy response in high-grade serous ovarian cancer
Source: Frontiers journal article supplement (doi:10.3389/fphar.2024.1450751), 2024-11-13
Supplement: Data_Sheet_1.zip [file Data_Sheet_1.zip]

Supplementary Material


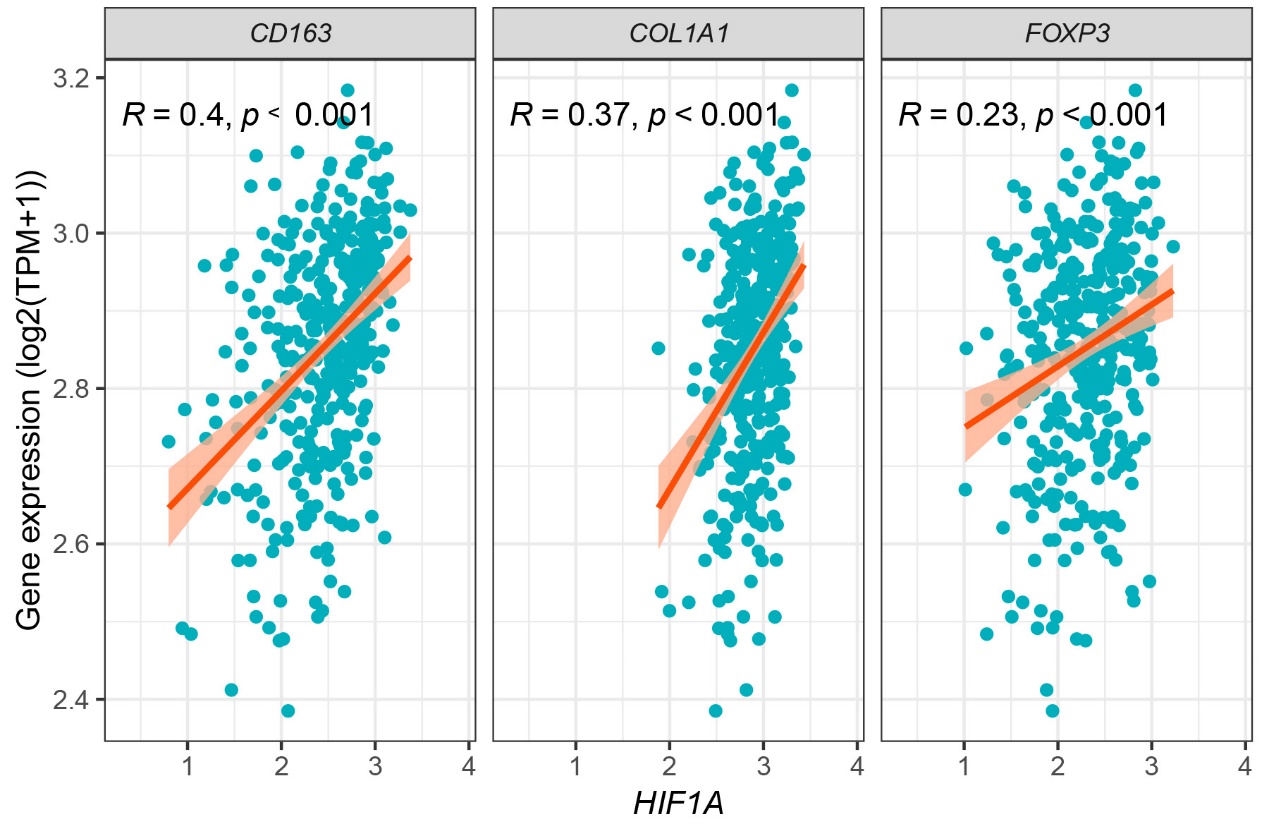


Figure S1. Correlation analysis of *HIF1A* with *CD163*, *COL1A1*, and *FOXP3*.


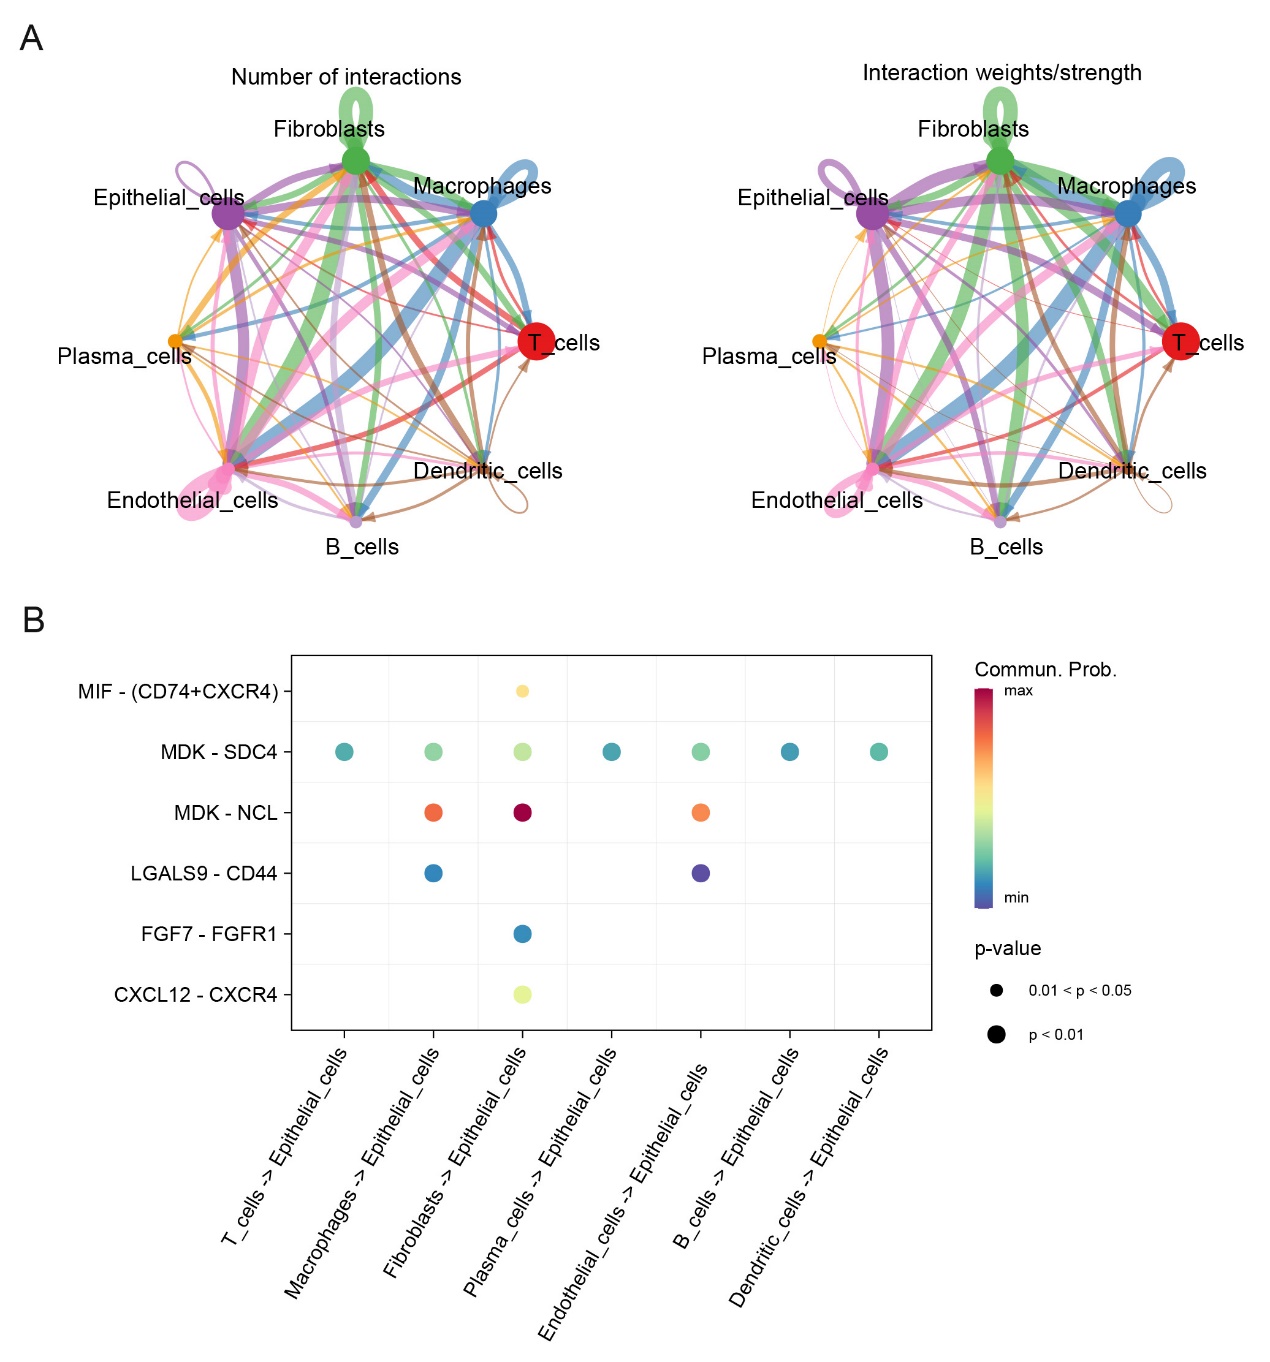


Figure S2. (A) The number and weight of cell-cell interactions. (B) Ligand-receptor analysis between epithelial cells and other cells.
